# Supplementary material for: Tautomerism and electronic spectroscopy of protonated 1- and 2-aminonaphthalene
Source: Royal Society of Chemistry journal article supplement (doi:10.1039/c8cp00218e), 2018-01-01
Supplement: c8cp00218e1.pdf [file c8cp00218e1.pdf]

## Supplementary information

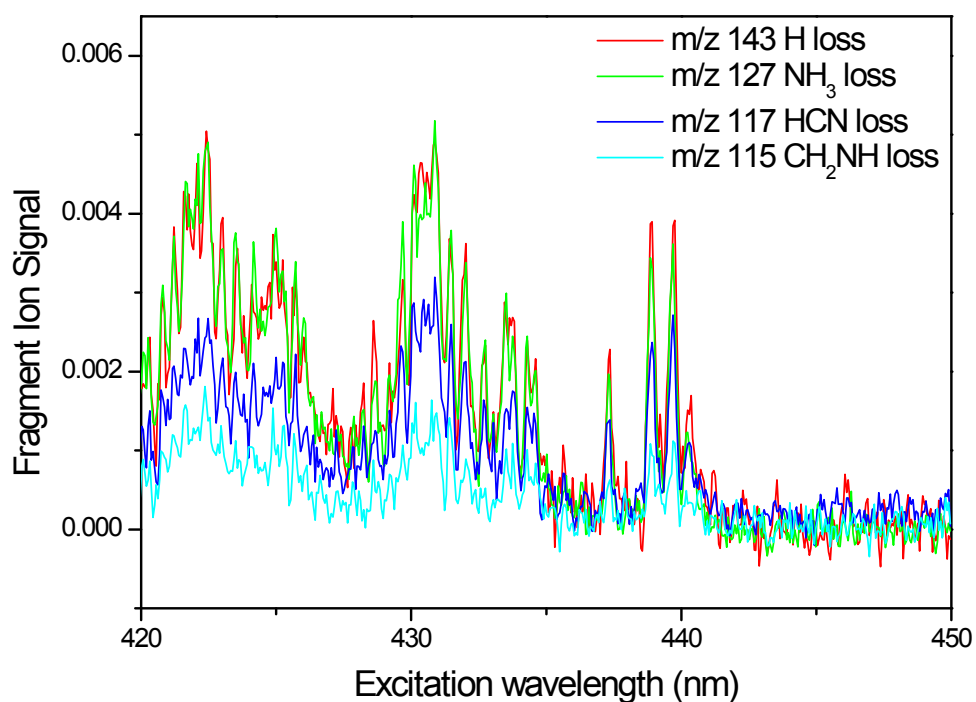

Figure SI-1: Photofragmentation spectra recorded on different fragments in the first band system of 1-ANpH<sup>+</sup> around 440 nm, showing that the branching ratio between the m/z 115/117/127/143 fragmentation channels is 1/2/3/3.

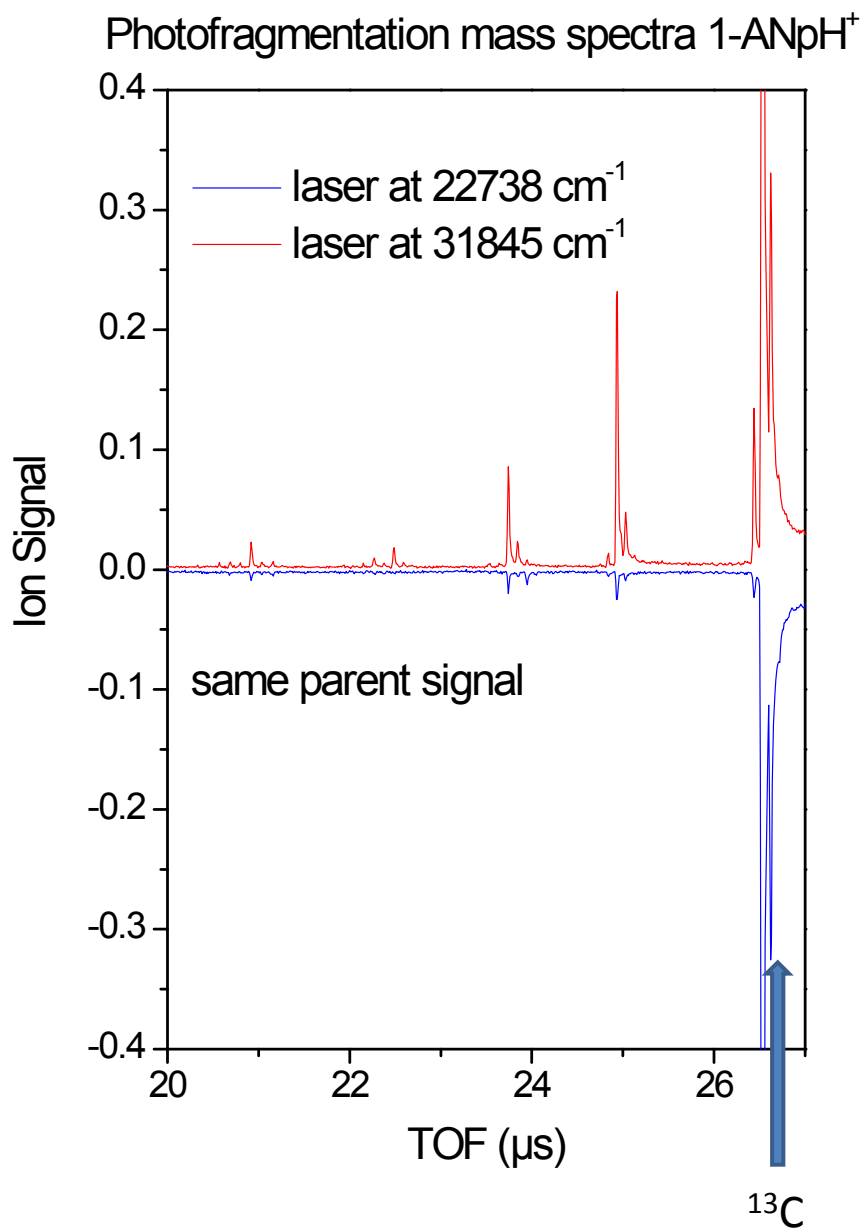

Figure SI-2: 1-ANpH<sup>+</sup> photofragmentation mass spectra. Red trace: excitation of the 0-0 band of the D1 band system; bleu trace: excitation of the 0-0 band of the A1 band system. The intensity of the parent ion is saturated in the spectra but is deduced from the intensity of the parent ion containing one <sup>13</sup>C atom (blue arrow), which represents 10% of the ion containing only <sup>12</sup>C atoms. For the D1 band system the fragment ion signal represents ~15% of the parent signal whereas it represents only ~2% when the A1 band system is excited. This makes the hole burning experiment on the A1 /B1 band systems unfeasible with our experimental setup.

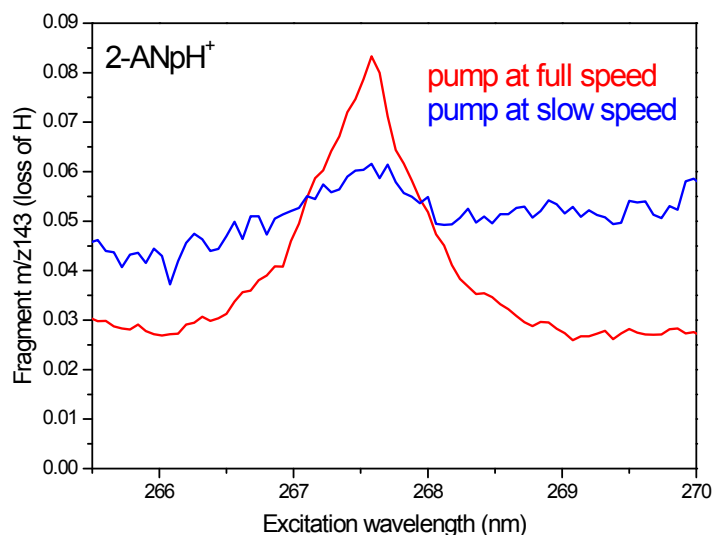

Figure SI-3: 2-ANpH<sup>+</sup> photofragmentation spectrum in the UV spectral region of the D2 band: effect of decreasing the pumping speed (i.e. increasing the pressure) in the ion formation region: In red, low pressure conditions, both the background due to the 2-ANpNH<sub>3</sub><sup>+</sup> tautomer and the D2 band at 267 nm are observed; in blue, high pressure conditions, the 267 nm band disappears and the background increases, which means that the D2 band system does not correspond to an excited state of the 2-ANpNH<sub>3</sub><sup>+</sup> tautomer. As it was observed by others groups<sup>9-12</sup> we have also tried to modify the tautomer distribution by changing the pH of the solution, the water/methanol ratio (from pure methanol to 20% methanol/80% water), the solvent (acetonitrile instead of water/methanol), the voltages on the needle and on the skimmer, but no strong and reproducible tautomer distribution change was observed.

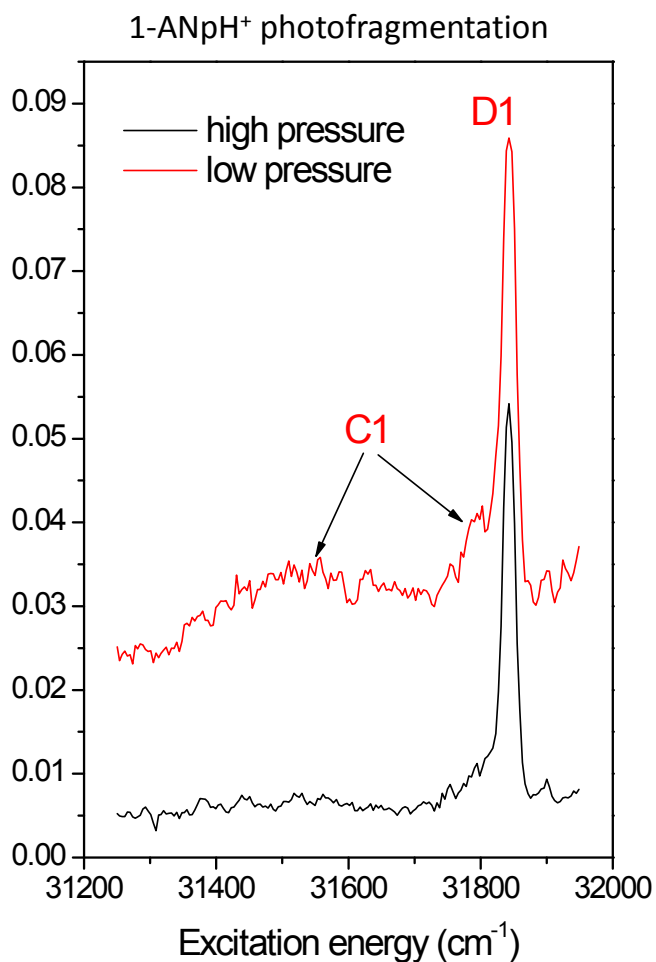

Figure SI-4: 1-ANpH<sup>+</sup> photofragmentation spectra under different pressure conditions in the first octopole chamber: black trace: under high pressure conditions, nearly only the ions protonated on the amino group (1-ANpNH<sub>3</sub><sup>+</sup>) are observed (D1 band system); red trace: under lower pressure conditions, the background assigned to the 1-ANpC<sub>n</sub>H<sub>2</sub><sup>+</sup> tautomers and the C1 bands assigned to the S<sub>2</sub> state of 1-ANpC<sub>n</sub>H<sub>2</sub><sup>+</sup> are observed. It should be reminded that in both cases the ion are excited in the trap after cryogenic cooling so that the bands appearing at low pressure cannot be hot bands.

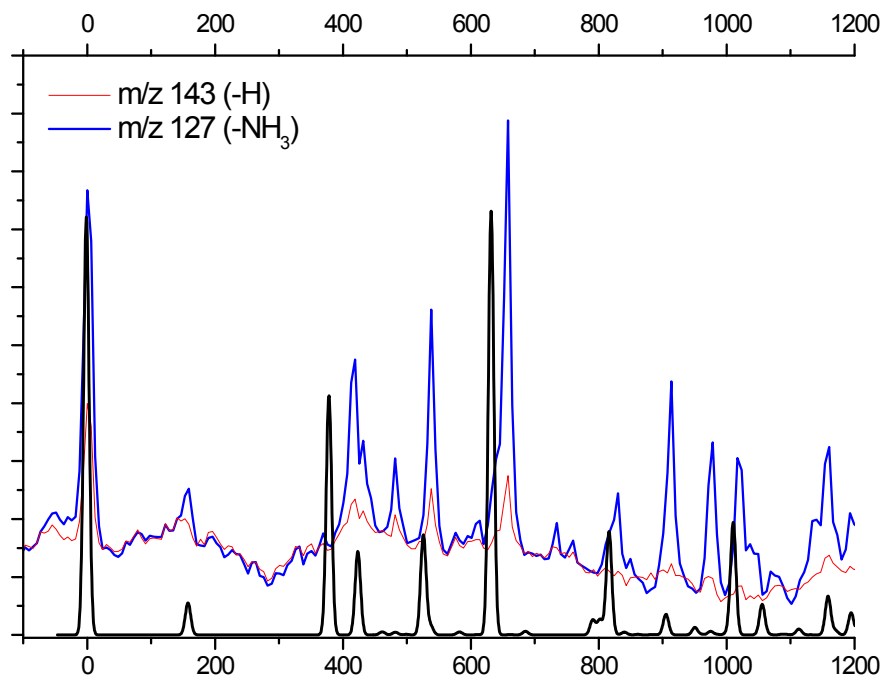

**Figure SI-5: Franck Condon simulation of the first excited state of the 1-ANpNH<sub>3</sub><sup>+</sup> tautomer (obtained using the Pgopher program) compared to the experimental photofragmentation spectrum.**

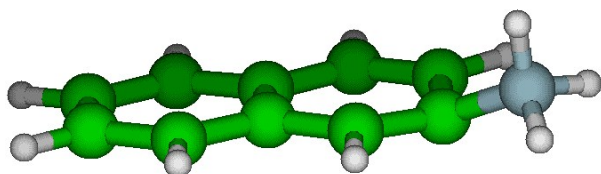

Figure SI-6: optimized structure of the 2-ANpNH<sub>3</sub><sup>+</sup> S<sub>1</sub> state calculated at the CC2/aug-cc-pVDZ level. The ammonium group is slightly out of the naphthalene plane by 24°.

Cartesian coordinate of the structure above

| ATOM | CARTESIAN COORDINATES |                   |                   |  |
|------|-----------------------|-------------------|-------------------|--|
| 1 c  | -0.03237626647460     | 0.09295118508548  | 0.01886026215097  |  |
| 2 c  | -0.10249855734972     | 0.19259376721050  | 2.70265055076771  |  |
| 3 c  | 2.29804003945061      | -0.06849833538860 | -1.35743673585278 |  |
| 4 c  | 4.68397747486221      | -0.13083661528096 | -0.00584351228890 |  |
| 5 c  | 2.33852138400495      | -0.13966551106242 | -4.05848632755360 |  |
| 6 h  | 0.56905298765013      | -0.08399262607070 | -5.12850198931318 |  |
| 7 c  | 7.02194143835557      | -0.33875175091409 | -1.31536065729741 |  |
| 8 h  | 8.77753027802044      | -0.54407179763194 | -0.23019803727113 |  |
| 9 c  | 4.66231551952435      | -0.31126091068176 | -5.35659497028840 |  |
| 10 h | 4.65025822049470      | -0.28120996077809 | -7.43099384434985 |  |
| 11 c | 6.98251238547425      | -0.65221729762236 | -4.02310621736102 |  |
| 12 n | 9.33253814820944      | 0.19441807245318  | -5.37729548294762 |  |
| 13 c | 2.20332917266613      | 0.13059554005356  | 4.00712453048840  |  |
| 14 c | 4.56026959634376      | -0.03108564850672 | 2.67148689996979  |  |
| 15 h | 6.32169058283750      | -0.08088552649927 | 3.76283729991732  |  |
| 16 h | 2.24278301775756      | 0.20768095259240  | 6.07407526899866  |  |
| 17 h | -1.90058026239914     | 0.31470656848563  | 3.70897896369729  |  |
| 18 h | 9.21633557954636      | -0.17755894483688 | -7.28343006161966 |  |
| 19 h | -1.80247979280076     | 0.13505675887722  | -1.05759368125755 |  |
| 20 h | 10.88418153253196     | -0.76079644884641 | -4.70450733749599 |  |
| 21 h | 9.69335385620823      | 2.12030992845785  | -5.14511351326717 |  |

Figure SI-7: orbitals involved in the two first electronic transitions in the 1-ANpC<sub>4</sub>H<sub>2</sub><sup>+</sup> and 1-ANpNH<sub>3</sub><sup>+</sup> tautomers.

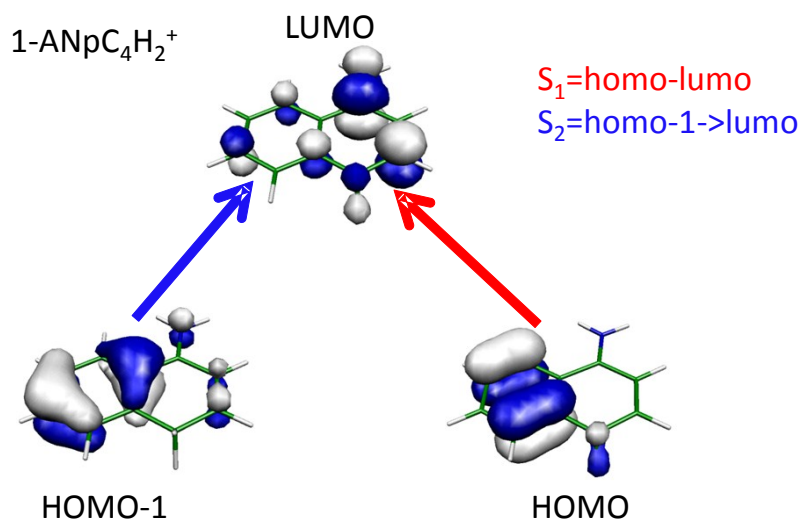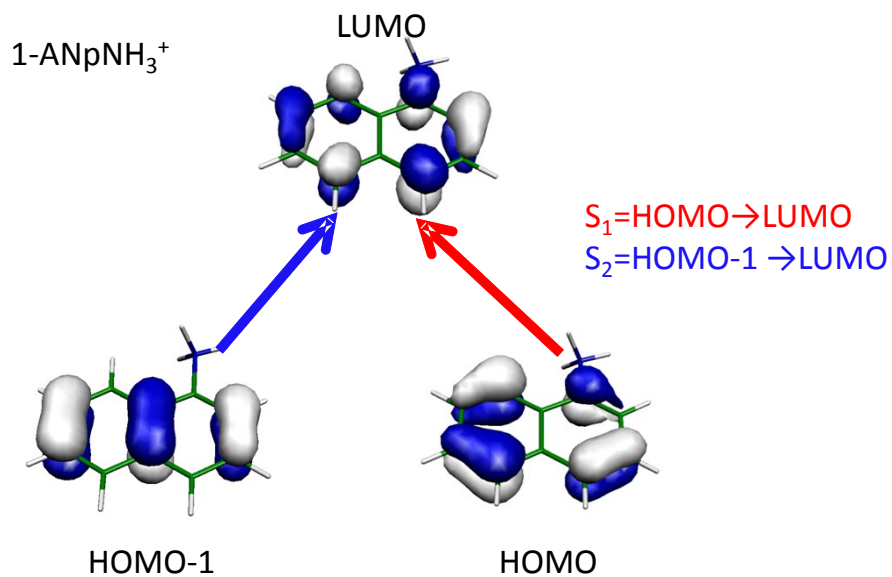

Figure SI-8: orbitals involved in the two first electronic transitions in the 2-ANpC<sub>1</sub>H<sub>2</sub><sup>+</sup> and 2-ANpNH<sub>3</sub><sup>+</sup> tautomers.

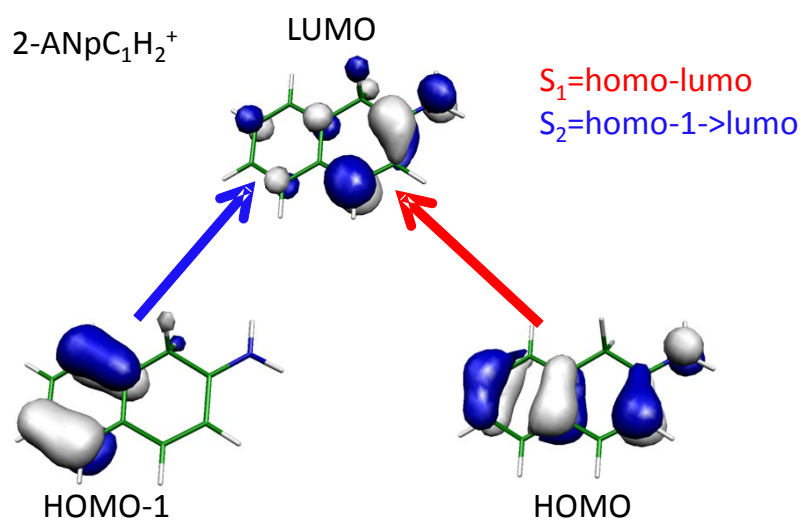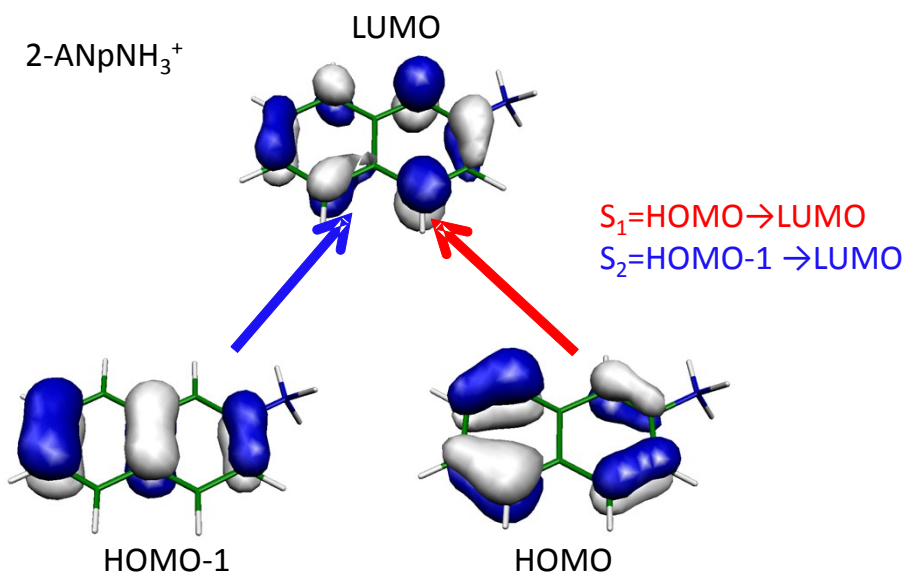



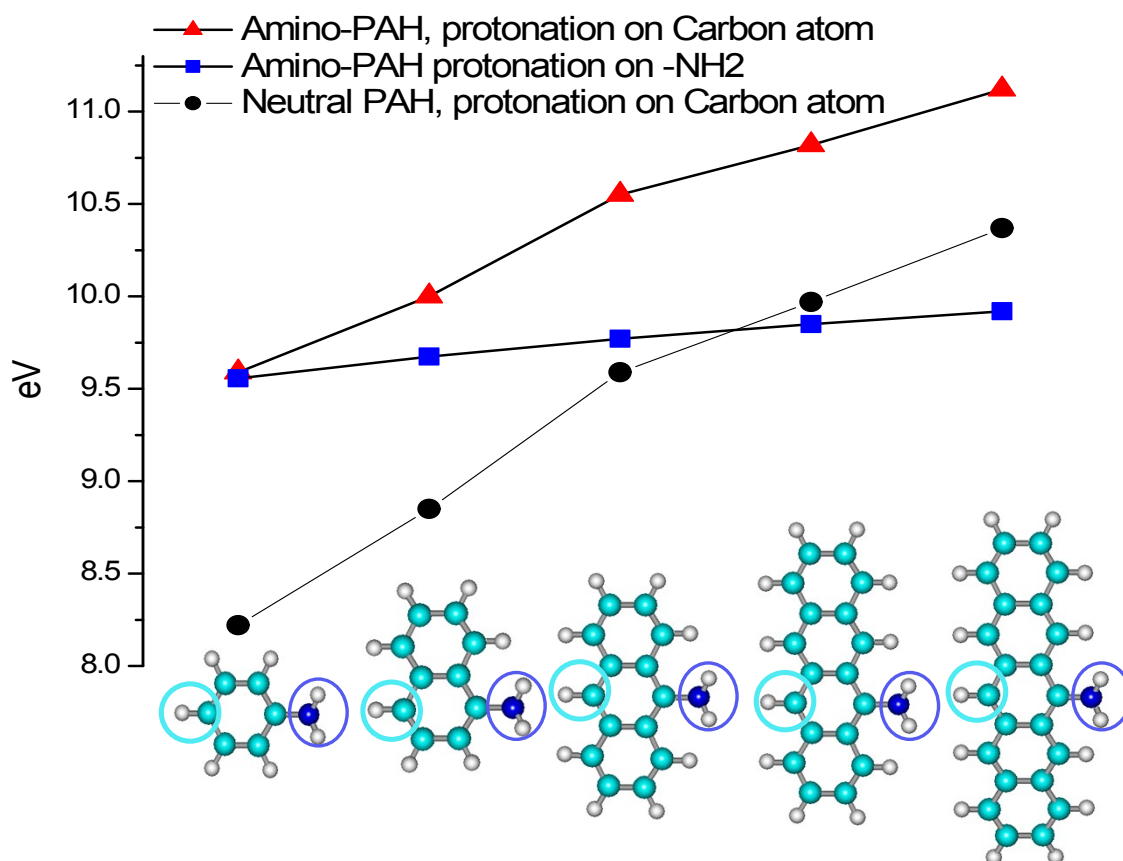

Figure SI-9: Evolution of proton affinities (PA) with the molecular size; in addition to figure 6 in the manuscript, the PA of protonated unsubstituted PAH (black circles) has been added. For homogeneity, the PA values of neutral PAHs reported in this figure have been calculated using the same method as for the amino aromatic molecules, DFT/B3LYP/cc-pVDZ.:

*Table SI-1: Relative ground state energies calculated at different levels of theory for different 1- and 2-ANpH<sup>+</sup> tautomers (cc-pVDZ basis set). The energies are relative to the ground state energy of the 1-ANpNH<sub>3</sub><sup>+</sup> or 2-ANpNH<sub>3</sub><sup>+</sup> tautomer. All energies are in eV (cm<sup>-1</sup>, in parenthesis). We report all eV values to the nearest 0.01 eV and all wavenumber values to the nearest 5 cm<sup>-1</sup>.*

|         | 1-ANpNH <sub>3</sub> <sup>+</sup> | 1-ANpC <sub>2</sub> H <sub>2</sub> <sup>+</sup> | 1-ANpC <sub>3</sub> H <sub>2</sub> <sup>+</sup> | 1-ANpC <sub>4</sub> H <sub>2</sub> <sup>+</sup> | 1-ANpC <sub>5</sub> H <sub>2</sub> <sup>+</sup> | 1-ANpC <sub>6</sub> H <sub>2</sub> <sup>+</sup> | 1-ANpC <sub>7</sub> H <sub>2</sub> <sup>+</sup> | 1-ANpC <sub>8</sub> H <sub>2</sub> <sup>+</sup> |
|---------|-----------------------------------|-------------------------------------------------|-------------------------------------------------|-------------------------------------------------|-------------------------------------------------|-------------------------------------------------|-------------------------------------------------|-------------------------------------------------|
| DFT     | 0<br>0                            | -0.14<br>(-1130)                                | +0.80<br>(+6450)                                | -0.33<br>(-2660)                                | +0.39<br>(+3150)                                | +0.80<br>(+6450)                                | +0.42<br>(+3390)                                | +0.62<br>(+5000)                                |
| CC2     | 0                                 | +0.07                                           |                                                 | -0.12                                           |                                                 |                                                 |                                                 |                                                 |
| CCSD(T) | 0                                 | -0.032<br>(-255)                                |                                                 | -0.21<br>(-1715)                                |                                                 |                                                 |                                                 |                                                 |
| MP2     | 0                                 | +0.17                                           |                                                 | -0.01                                           |                                                 |                                                 |                                                 |                                                 |
| MP4     | 0                                 | 0.009<br>(+75)                                  |                                                 | -0.17<br>(-1360)                                |                                                 |                                                 |                                                 |                                                 |

|         | 2-ANpNH <sub>3</sub> <sup>+</sup> | 2-ANpC <sub>1</sub> H <sub>2</sub> <sup>+</sup> | 2-ANpC <sub>3</sub> H <sub>2</sub> <sup>+</sup> | 2-ANpC <sub>4</sub> H <sub>2</sub> <sup>+</sup> | 2-ANpC <sub>5</sub> H <sub>2</sub> <sup>+</sup> | 2-ANpC <sub>6</sub> H <sub>2</sub> <sup>+</sup> | 2-ANpC <sub>7</sub> H <sub>2</sub> <sup>+</sup> | 2-ANpC <sub>8</sub> H <sub>2</sub> <sup>+</sup> |
|---------|-----------------------------------|-------------------------------------------------|-------------------------------------------------|-------------------------------------------------|-------------------------------------------------|-------------------------------------------------|-------------------------------------------------|-------------------------------------------------|
| DFT     | 0<br>0                            | -0.31<br>(-2500)                                | +0.28<br>(+2260)                                | 0.67<br>(+5400)                                 | +0.57<br>(+4600)                                | +0.07<br>(+565)                                 | +0.68<br>(+5480)                                | +0.06<br>(+485)                                 |
| CC2     | 0                                 | -0.09                                           |                                                 |                                                 |                                                 | +0.37                                           | +1.04                                           | +0.36                                           |
| CCSD(T) | 0                                 | -0.14<br>(-1170)                                |                                                 |                                                 |                                                 | +0.26<br>(+2060)                                |                                                 | +0.29<br>(+2370)                                |
| MP2     | 0                                 | +0.03                                           |                                                 |                                                 |                                                 | +0.57                                           | +1.11                                           | +0.57                                           |
| MP4     | 0                                 | -0.11<br>(-865)                                 |                                                 |                                                 |                                                 | +0.32<br>(+2555)                                |                                                 | +0.35<br>(+2815)                                |

As seen above, the 1-ANpC<sub>4</sub>H<sub>2</sub><sup>+</sup> tautomer is always found more stable than the 1-ANpNH<sub>3</sub><sup>+</sup> tautomer. The 1-ANpC<sub>2</sub>H<sub>2</sub><sup>+</sup> is more stable than 1-ANpNH<sub>3</sub><sup>+</sup> with DFT and almost isoenergetic with 1-ANpNH<sub>3</sub><sup>+</sup> using CCSD(T) or MP4 methods. For 2-ANpH<sup>+</sup>, the 2-ANpC<sub>1</sub>H<sub>2</sub><sup>+</sup> tautomer is more stable than the 2-ANpNH<sub>3</sub><sup>+</sup> tautomer, while the 2-ANpC<sub>6</sub>H<sub>2</sub><sup>+</sup> and 2-ANpC<sub>8</sub>H<sub>2</sub><sup>+</sup> tautomers are always less stable than the 2-ANpNH<sub>3</sub><sup>+</sup> tautomer. As already noted in previous reports <sup>1</sup>, MP2 (see table SI-1 ) method overestimates the stability of the NH<sub>3</sub><sup>+</sup> tautomer as compared to the C<sub>n</sub>H<sub>2</sub><sup>+</sup> tautomers, while DFT, MP4 and CCSD(T) methods provide consistent results.

**Table SI-2: Calculated frequencies at the CC2/aug-cc-pVDZ level of the first excited state of 1-ANpNH<sub>3</sub><sup>+</sup> and tentative assignment of the bands observed**

| Mode number | Calculated frequencies |                                  | Observed frequencies | tentative assignment             |
|-------------|------------------------|----------------------------------|----------------------|----------------------------------|
| 1           | 80                     | NH <sub>3</sub> rotation         |                      |                                  |
| 2           | 136                    | NH <sub>3</sub> rotation         |                      |                                  |
| 3           | 152                    | Ring deformation out of plane    |                      |                                  |
|             |                        |                                  | 159 (2*80)           | <sup>2</sup> <sub>10</sub>       |
| 4           | 163                    | Ring deformation out of plane    |                      |                                  |
| 5           | 249                    | NH <sub>3</sub> bending in plane |                      |                                  |
| 6           | 302                    | Ring deformation out of plane    |                      |                                  |
| 7           | 354                    | Ring deformation out of plane    |                      |                                  |
| 8           | 379                    | Ring deformation in plane        | 419                  | <sup>1</sup> <sub>80</sub>       |
| 9           | 404                    | Ring deformation out of plane    |                      |                                  |
| 10          | 420                    | Ring deformation out of plane    |                      |                                  |
| 11          | 424                    | Ring deformation in plane        | 482                  | <sup>1</sup> <sub>110</sub>      |
| 12          | 463                    | Ring deformation in plane        |                      |                                  |
| 13          | 527                    | Ring deformation in plane        | 538                  | <sup>1</sup> <sub>130</sub>      |
| 14          | 531                    | C2H out of plane                 |                      |                                  |
| 15          | 583                    | Ring deformation out of plane    |                      |                                  |
| 16          | 633                    | Ring breathing in plane          | 658                  | <sup>1</sup> <sub>160</sub>      |
| 17          | 684                    | CH out of plane                  |                      |                                  |
| 18          | 736                    | CH out of plane                  |                      |                                  |
| 19          | 752                    | CH out of plane                  |                      |                                  |
| 20          | 755                    | Ring deformation in plane        |                      |                                  |
| 21          | 817                    | Ring in plane                    | 830                  | <sup>1</sup> <sub>210</sub>      |
| 22          | 832                    | CH out of plane                  |                      |                                  |
| 23          | 853                    | CH out of plane                  |                      |                                  |
| 24          | 874                    | CH out of plane                  |                      |                                  |
| 25          | 907                    | Ring deformation in plane        |                      |                                  |
|             |                        |                                  | 914                  | <sup>1 1</sup> <sub>80130</sub>  |
|             |                        |                                  | 978                  | <sup>1 1</sup> <sub>110130</sub> |
| 26          | 992                    | ring in plane                    |                      |                                  |
|             |                        |                                  | 1017                 | <sup>1 1</sup> <sub>80160</sub>  |

|    |      |                                                      |      |                          |
|----|------|------------------------------------------------------|------|--------------------------|
| 27 | 1025 | NH/CH in plane                                       |      |                          |
| 28 | 1040 | NH <sub>3</sub> out of plane                         |      |                          |
| 29 | 1044 | NH & CH bend in plane                                |      |                          |
| 30 | 1108 | CH bend in plane                                     |      |                          |
| 31 | 1137 | CH bend in plane                                     |      |                          |
| 32 | 1150 | CH bend in plane                                     |      |                          |
|    |      |                                                      | 1160 | <sup>1</sup> 1<br>130160 |
|    |      |                                                      | 1196 |                          |
| 33 | 1207 | CH bend in plane                                     |      |                          |
|    |      |                                                      | 1219 | <sup>1</sup> 1<br>80210  |
| 34 | 1228 | CH bend in plane                                     |      |                          |
| 35 | 1242 | CH bend in plane                                     |      |                          |
| 36 | 1344 | CH bend in plane                                     |      |                          |
|    |      |                                                      | 1351 |                          |
| 37 | 1384 | CH bend in plane                                     |      |                          |
|    |      |                                                      | 1390 |                          |
| 38 | 1408 | CH bend in plane                                     |      |                          |
| 39 | 1427 | CH bend in plane & NH <sub>3</sub> umbrella          |      |                          |
| 40 | 1444 | CH bend in plane & ring deformation                  |      |                          |
|    |      |                                                      | 1450 |                          |
| 41 | 1470 | Ring deformation in plane & NH <sub>3</sub> umbrella |      |                          |
| 42 | 1479 | NH <sub>3</sub> umbrella                             |      |                          |
| 43 | 1489 | Ring deformation in plane                            |      |                          |
|    |      |                                                      | 1497 |                          |
|    |      |                                                      | 1550 |                          |
| 44 | 1618 | NH <sub>3</sub> antisymmetric bend                   |      |                          |
| 45 | 1618 | NH symmetric +ring deformation in plane              |      |                          |
| 46 | 1632 | NH symmetric bend                                    |      |                          |
| 47 | 1659 | NH symmetric +ring deformation in plane              |      |                          |
| 48 | 3171 | CH stretch                                           |      |                          |
| 49 | 3202 | CH stretch                                           |      |                          |
| 50 | 3204 | CH stretch                                           |      |                          |
| 51 | 3208 | CH stretch                                           |      |                          |
| 52 | 3217 | CH stretch                                           |      |                          |
| 53 | 3230 | CH stretch                                           |      |                          |
| 54 | 3242 | CH stretch                                           |      |                          |
| 55 | 3335 | NH <sub>3</sub> stretch symmetric                    |      |                          |
| 56 | 3413 | NH <sub>3</sub> stretch antisymmetric                |      |                          |
| 57 | 3479 | NH <sub>3</sub> stretch antisymmetric                |      |                          |

Table SI-3: Comparison of the calculated tautomer stability for ions isolated in the gas phase or ions in solution calculated using COSMO (COnductor-like Screening Model) as implemented in the Turbomole package. The calculations indicate that the tautomer protonated on the amino group is the most stable in solution, whereas protonation on a carbon atom (C4 for 1-ANpH<sup>+</sup> and C1 for 2-ANpH<sup>+</sup>) is favored for isolated molecules.

|                                                 | DFT   | DFT+COSMO<br>( $\epsilon=80$ ) |
|-------------------------------------------------|-------|--------------------------------|
| 1-ANpNH <sub>3</sub> <sup>+</sup>               | 0     | 0                              |
| 1-ANpC <sub>2</sub> H <sub>2</sub> <sup>+</sup> | -0.14 | +0.35                          |
| 1-ANpC <sub>4</sub> H <sub>2</sub> <sup>+</sup> | -0.33 | +0.22                          |
| 2-ANpNH <sub>3</sub> <sup>+</sup>               | 0     | 0                              |
| 2-ANpC <sub>1</sub> H <sub>2</sub> <sup>+</sup> | -0.31 | +0.24                          |

## Energetics of the dissociation channels

The energetics of the dissociation channels has been calculated at the DFT level and is summarized in figure 5 together with the energy of the observed excited states. (The details of the calculations can be found in the table SI-4)

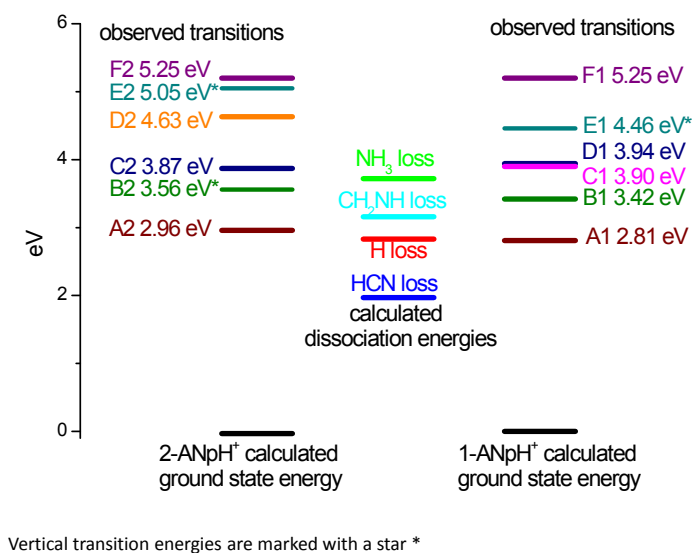

Figure 5: Comparison between the energy of the electronic transitions and the energy of the dissociation channels.

The lower dissociation energy corresponds to the HCN loss channel, well under the energy of the first band system, while the NH<sub>3</sub> loss channel has the highest dissociation energy, slightly under the energy of the most intense band system D1 and C2. It should be noted that the H loss channel as well as the NH<sub>3</sub> loss channel are simple bond cleavage for aminonaphthalene protonated on the amino group. On the other hand, the other dissociation channels necessitate rearrangement processes involving barriers higher than the dissociation energy. As in protonated aminopyrene<sup>1</sup>, the NH<sub>3</sub> loss channel is higher in energy than the H loss channel by almost 1 eV.

Note that the HCN loss channel is observed for the low energy band systems (A1, B1 and A2), but absent when exciting the D1 and C2 major band systems. In protonated diazine and aminopyridine<sup>2</sup> the HCN loss channel mechanism involves a hydrogen or proton transfer to a carbon atom, and if the same mechanism is assumed for ANpH<sup>+</sup>, the most probable parents will

be the ANpC<sub>n</sub>H<sub>2</sub><sup>+</sup> tautomers. This would therefore mean that the D1 and C2 band systems correspond to 1-and 2-ANpNH<sub>3</sub><sup>+</sup> tautomers. These assumptions may be checked by comparison with calculations of the excited state transitions.

*Table SI-4: Energetics of the dissociation channels*

|                                                                    | Energy<br>DFT/B3lyp<br>(hartree) | Proton affinity<br>(eV)     |      | Energy<br>DFT/B3lyp<br>(hartree) |                                                                    |
|--------------------------------------------------------------------|----------------------------------|-----------------------------|------|----------------------------------|--------------------------------------------------------------------|
| 1-ANp<br>mass 143                                                  | -440.9942406                     |                             |      | -440.99413893                    | 2-ANp<br>mass 143                                                  |
| 1-ANpH <sup>+</sup><br>m/z 144                                     | -441.3497544                     | 9.67                        | 9.71 | -441.35092526                    | 2-ANpH <sup>+</sup><br>m/z 144                                     |
|                                                                    |                                  | Dissociation<br>Energy (eV) |      |                                  |                                                                    |
| HCN loss channel<br>m/z 117 + 27 (HCN)                             | -347.899-93.378<br>=-441.277     | 1.97                        | 2.00 | -347.899-93.378<br>=-441.277     | HCN loss channel<br>m/z 117 + 27 (HCN)                             |
| H loss channel<br>m/z 143 (1-ANp <sup>+</sup> ) +1<br>(H)          | -440.7476-0.4983<br>=-441.2459   | 2.83                        | 2.87 | -440.7472-0.4983<br>=-441.2455   | H loss channel<br>m/z 143 (2-ANp <sup>+</sup> ) +1<br>(H)          |
| CH <sub>2</sub> NH loss channel<br>m/z 115+29 (CH <sub>2</sub> NH) | -346.659-94.574<br>=-441.233     | 3.16                        | 3.19 | -346.659-94.574<br>=-441.233     | CH <sub>2</sub> NH loss channel<br>m/z 115+29 (CH <sub>2</sub> NH) |
| NH <sub>3</sub> loss channel<br>m/z 127 +17 (NH <sub>3</sub> )     | -384.695-56.518<br>=-441.213     | 3.72                        | 3.84 | -384.692-56.518<br>=-441.210     | NH <sub>3</sub> loss channel<br>m/z 127 +17 (NH <sub>3</sub> )     |

## References

- (1) Noble, J. A.; Dedonder-Lardeux, C.; Mascetti, J.; Jouvet, C. Electronic Spectroscopy of Protonated 1-Aminopyrene in a Cold Ion Trap. *Chem. - An Asian J.* **2017**, *125*, 1523–1531.
- (2) Broquier, M.; Soorkia, S.; Dedonder-Lardeux, C.; Jouvet, C.; Theulé, P.; Grégoire, G. Twisted Intramolecular Charge Transfer in Protonated Amino Pyridine. *J. Phys. Chem. A* **2016**, *120* (21), 3797–3809.
